# Supplementary material for: Different electronic structures and spectroscopic properties of cationic [M(ppy)2(N∧N)]+ (M = Rh, Ir; N∧N = Hcmbpy, H2dcbpy), a DFT study
Source: Royal Society of Chemistry journal article supplement (doi:10.1039/b819014c), 2009-01-01
Supplement: b819014c.pdf [file b819014c.pdf]

## Supporting information

for

### Different Electronic Structures and Spectroscopic Properties of Cationic $[M(\text{ppy})_2(\text{N}^{\wedge}\text{N})]^+$ ( $M=\text{Rh}, \text{Ir}$ ; $\text{N}^{\wedge}\text{N}=\text{Hcmbpy},$ $\text{H}_2\text{dcbpy}$ ), A DFT Study

Submitted to journal- **Phys. Chem. Chem. Phys.** by:

**Xiao-Na Li<sup>a,b</sup>, Zhi-Jian Wu<sup>a</sup>, Hong-Jie Zhang<sup>\*,a</sup>, Xiao-Juan Liu<sup>a</sup>, Liang Zhou<sup>a,b</sup>,**

**Zhe-Feng, Li<sup>a,b</sup>, and Zhen-Jun Si<sup>a,b</sup>**

<sup>a</sup> *State Key Laboratory of Rare Earth Resource Utilization, Changchun Institute of Applied  
Chemistry, Chinese Academy of Sciences, Changchun 130022, People's Republic of  
China.*

<sup>b</sup> *Graduate School of the Chinese Academy of Sciences, Beijing, People's Republic of China*

**Table S1.** Partial molecular orbital compositions (%) for **Rh1** in the ground state.

| MO                              | energy<br>(eV) | compositions (%)                                                  |      |      |      |                 |                    | bond type |
|---------------------------------|----------------|-------------------------------------------------------------------|------|------|------|-----------------|--------------------|-----------|
|                                 |                | Rh                                                                | ppy  | bpy  | COOH | CH <sub>3</sub> |                    |           |
| 150a                            | -3.7827        | 2.2/1.7 $p_z$                                                     | 1.0  | 91.8 | 1.7  | 3.3             | $\pi^*$ (bpy)      |           |
| 149a                            | -3.9457        | 4.9/2.4 $d_{x^2-y^2}$                                             | 86.1 | 8.8  |      |                 | $\pi^*$ (ppy)      |           |
| 148a                            | -4.0091        | 4.9/2.4 $d_{yz}$                                                  | 92.1 | 4.9  |      |                 | $\pi^*$ (ppy)      |           |
| 147a                            | -4.4553        |                                                                   |      | 89.5 | 9.6  |                 | $\pi^*$ (bpy)      |           |
| 146a(L)                         | -5.1228        | 2.6/1.5 $d_{yz}$                                                  |      | 86.4 | 10.1 |                 | $\pi^*$ (bpy)      |           |
| <i>HOMO-LUMO gap (3.0281eV)</i> |                |                                                                   |      |      |      |                 |                    |           |
| 145a(H)                         | -8.1509        | 30.4/4.2 $d_{xy}$ +5.2 $d_{xz}$ +8.9 $d_{x^2-y^2}$ +9.0 $d_{z^2}$ | 67.6 | 2.0  |      |                 | d(Rh)+ $\pi$ (ppy) |           |
| 144a                            | -8.5095        | 1.6                                                               | 96.7 | 1.6  |      |                 | $\pi$ (ppy)        |           |
| 143a                            | -8.7387        | 5.5/2.8 $d_{x^2-y^2}$ +2.2 $d_{z^2}$                              | 93.8 |      |      |                 | $\pi$ (ppy)        |           |
| 142a                            | -8.8298        | 3.0/2.4 $d_{yz}$                                                  | 95.1 | 1.8  |      |                 | $\pi$ (ppy)        |           |
| 141a                            | -9.2590        | 61.1/37.1 $d_{xy}$ +10.7 $d_{xz}$ +10.1 $d_{x^2-y^2}$             | 34.2 | 4.4  |      |                 | d(Rh)+ $\pi$ (ppy) |           |

**TableS2.** Partial molecular orbital compositions (%) for **Ir2** in the ground state.

| MO                              | energy<br>(eV) | Ir                                                                 | compositions (%) |      |      |                 | bond type               |
|---------------------------------|----------------|--------------------------------------------------------------------|------------------|------|------|-----------------|-------------------------|
|                                 |                |                                                                    | ppy              | bpy  | COOH | CH <sub>3</sub> |                         |
| 150a                            | -3.8999        | 3.9/1.4 $d_{z^2}$                                                  | 54.7             | 36.0 | 4.0  | 1.3             | $\pi^*(ppy)+\pi^*(bpy)$ |
| 149a                            | -3.9500        | 4.8/1.5 $d_{x^2-y^2}$                                              | 24.0             | 65.9 | 3.3  | 1.9             | $\pi^*(ppy)+\pi^*(bpy)$ |
| 148a                            | -4.0009        | 4.7/2.6 $d_{yz}$                                                   | 80.4             | 4.7  |      |                 | $\pi^*(ppy)$            |
| 147a                            | -4.5696        |                                                                    |                  | 88.7 | 11.2 |                 | $\pi^*(bpy)$            |
| 146a(L)                         | -5.2510        | 4.1/2.7 $d_{yz}$                                                   |                  | 82.6 | 10.0 |                 | $\pi^*(bpy)$            |
| <i>HOMO-LUMO gap (2.5875eV)</i> |                |                                                                    |                  |      |      |                 |                         |
| 145a(H)                         | -7.8385        | 34.0/4.7 $d_{xy}$ +6.1 $d_{xz}$ +9.4 $d_{x^2-y^2}$ +10.1 $d_{z^2}$ | 63.2             | 2.7  |      |                 | d (Ir)+ $\pi(ppy)$      |
| 144a                            | -8.4470        | 4.0/1.6 $d_{yz}$                                                   | 94.2             | 1.7  |      |                 | $\pi(ppy)$              |
| 143a                            | -8.6222        | 14.4/5.7 $d_{xy}$ +4.7 $d_{x^2-y^2}$ +3.1 $d_{z^2}$                | 85.4             | 1.1  |      |                 | $\pi(ppy)$              |
| 142a                            | -8.7381        | 10.5/7.8 $d_{yz}$                                                  | 87.7             | 1.7  |      |                 | $\pi(ppy)$              |
| 141a                            | -8.9087        | 50.1/31.5 $d_{xy}$ +8.3 $d_{xz}$ +7.1 $d_{x^2-y^2}$                | 46.4             | 3.6  |      |                 | d (Ir)+ $\pi(ppy)$      |

**Table S3** Partial molecular orbital compositions (%) for **Rh3** in the ground state.

| MO                              | energy<br>(eV) | compositions (%)                                       |      |      |      | bond type           |
|---------------------------------|----------------|--------------------------------------------------------|------|------|------|---------------------|
|                                 |                | Rh                                                     | ppy  | bpy  | COOH |                     |
| 157a                            | -4.0273        | 4.8/2.5 $d_{yz}$                                       | 92.5 | 2.6  |      | $\pi^*$ (ppy)       |
| 156b                            | -4.0991        | 5.1/1.8 $d_{xz}$ + 1.7 $d_{yz}$                        | 92.0 | 3.9  |      | $\pi^*$ (ppy)       |
| 155b                            | -4.5500        |                                                        |      | 91.2 | 7.6  | $\pi^*$ (ppy)       |
| 154a                            | -4.7497        |                                                        | 2.8  | 73.0 | 26.4 | $\pi^*$ (bpy)       |
| 153b(L)                         | -5.3957        | 3.0/2.2 $d_{xz}$                                       | 3.8  | 81.8 | 11.4 | $\pi^*$ (bpy)       |
| <i>HOMO-LUMO gap (2.8636eV)</i> |                |                                                        |      |      |      |                     |
| 152a(H)                         | -8.2593        | 29.7/22.1 $d_{xy}$ + 4.4 $d_{x^2-y^2}$ + 3.0 $d_{z^2}$ | 68.3 | 2.0  |      | d (Rh)+ $\pi$ (ppy) |
| 151b                            | -8.5980        | 1.6/0.8 $d_{yz}$                                       | 96.8 | 1.6  |      | $\pi$ (ppy)         |
| 150a                            | -8.8271        | 5.3/2.8 $d_{xy}$ + 1.6 $d_{x^2-y^2}$                   | 94.1 | 0.6  |      | $\pi$ (ppy)         |
| 149b                            | -8.9185        | 2.6/1.9 $d_{xz}$                                       | 95.7 | 1.7  |      | $\pi$ (ppy)         |
| 148a                            | -9.3896        | 61.7/53.9 $d_{z^2}$ + 7.2 $d_{x^2-y^2}$                | 34.8 | 3.5  |      | d (Rh)+ $\pi$ (ppy) |

**TableS4.** Partial molecular orbital compositions (%) for **Ir4** in the ground state.

| MO                              | energy<br>(eV) | compositions (%)                                       |      |      |      | bond type          |
|---------------------------------|----------------|--------------------------------------------------------|------|------|------|--------------------|
|                                 |                | Ir                                                     | ppy  | bpy  | COOH |                    |
| 157a                            | -4.0189        | 5.7/2.2 $d_{xy}$ + 1.3 $d_{z^2}$                       | 91.5 | 2.8  |      | $\pi^*$ (ppy)      |
| 156b                            | -4.0989        | 5.0/2.7 $d_{xz}$                                       | 91.1 | 3.9  |      | $\pi^*$ (ppy)      |
| 155b                            | -4.6480        | 1.4                                                    |      | 93.2 | 7.8  | $\pi^*$ (bpy)      |
| 154a                            | -4.8670        | 1.2                                                    |      | 74.2 | 25.3 | $\pi^*$ (bpy)      |
| 153b(L)                         | -5.5155        | 4.9/4.1 $d_{xz}$                                       | 3.5  | 81.2 | 10.4 | $\pi^*$ (bpy)      |
| <i>HOMO-LUMO gap (2.4468eV)</i> |                |                                                        |      |      |      |                    |
| 152a(H)                         | -7.9623        | 33.2/24.3 $d_{xy}$ + 4.7 $d_{x^2-y^2}$ + 3.9 $d_{z^2}$ | 64.2 | 2.6  |      | d(Ir)+ $\pi$ (ppy) |
| 151b                            | -8.5455        | 3.4/2.6 $d_{xz}$                                       | 94.9 | 1.7  |      | $\pi$ (ppy)        |
| 150a                            | -8.7264        | 11.1/6.2 $d_{z^2}$ + 3.2 $d_{x^2-y^2}$ + 1.6 $d_{xy}$  | 87.6 | 1.3  |      | d(Ir)+ $\pi$ (ppy) |
| 149b                            | -8.8434        | 7.0/6.6 $d_{xz}$                                       | 91.7 | 1.3  |      | $\pi$ (ppy)        |
| 148a                            | -9.0516        | 53.9/45.6 $d_{z^2}$ + 7.8 $d_{x^2-y^2}$                | 43.1 | 3.0  |      | d(Ir)+ $\pi$ (ppy) |

**Table S5.** Single-electron transitions according to TDDFT calculations for the absorption of the complexes in acetonitrile

|            | state          | energy (eV) | major contribution | character                                                | exptl <sup>20</sup> |
|------------|----------------|-------------|--------------------|----------------------------------------------------------|---------------------|
| <b>Ir2</b> | T <sub>1</sub> | 583/2.12    | HOMO→LUMO(100%)    | d (Ir)+π(ppy)→π <sup>*</sup> (bpy)/MLCT/LLCT             |                     |
|            | T <sub>2</sub> | 452/2.75    | HOMO-2→LUMO(47%)   | d (Ir)+π(ppy)→π <sup>*</sup> (bpy)/MLCT/LLCT             | 467                 |
|            | T <sub>3</sub> | 445/2.78    | HOMO-4→LUMO(35%)   | d (Ir)+π(ppy)→π <sup>*</sup> (bpy)/MLCT/LLCT             |                     |
|            | T <sub>4</sub> | 440/2.82    | HOMO-1→LUMO(65%)   | d (Ir)+π(ppy)→π <sup>*</sup> (ppy)/MLCT/ILCT             |                     |
|            | T <sub>5</sub> | 437/2.84    | HOMO→LUMO+3(35%)   | π(ppy)→π <sup>*</sup> (ppy)/LLCT                         |                     |
| <b>Ir4</b> | T <sub>1</sub> | 681/1.82    | HOMO-1→LUMO+2(22%) | d (Ir)+π(ppy)+π(bpy)→π <sup>*</sup> (ppy)/MLCT/ILCT/LLCT |                     |
|            | T <sub>2</sub> | 536/2.31    | HOMO→LUMO(100%)    | d (Ir)+π(ppy)→π <sup>*</sup> (bpy)/MLCT/LLCT             |                     |
|            | T <sub>3</sub> | 486/2.55    | HOMO-4→LUMO(28%)   | (Ir)+π(ppy)+π(bpy)→π <sup>*</sup> (bpy)/MLCT/ILCT/LLCT   |                     |
|            | T <sub>4</sub> | 459/2.70    | HOMO-2→LUMO(50%)   | d (Ir)+π(ppy)→π <sup>*</sup> (ppy)/LLCT                  | 457                 |
|            | T <sub>5</sub> | 457/2.71    | HOMO-1→LUMO(49%)   | (Ir)+π(ppy)+π(bpy)→π <sup>*</sup> (bpy)/MLCT/ILCT/LLCT   |                     |
|            |                |             | HOMO-3→LUMO(33%)   | π(ppy)→π <sup>*</sup> (ppy)/LLCT                         |                     |

**Table S6.** Partial molecular orbital compositions (%) of the complexes in the excited states under the TDDFT calculations.

| MO                | energy<br>(eV) | composition (%) |      |      |      | bond type                                 |
|-------------------|----------------|-----------------|------|------|------|-------------------------------------------|
|                   |                | M(M=Rh or Ir)   | ppy  | bpy  | COOH |                                           |
| <b>Rh1</b> 146(H) | -5.67          | 6.8             | 14.9 | 71.4 | 6.1  | $\pi^*$ (ppy+bpy)                         |
| 145(H-1)          | -9.03          | 3.2             | 5.1  | 90.5 | 1.1  | $\pi^*$ (bpy)                             |
| <b>Ir2</b> 146(H) | -5.70          | 3.2             | 3.1  | 86.6 | 5.7  | $\pi^*$ (bpy)                             |
| 145(H-1)          | -8.95          | 33.2            | 52.4 | 14.3 |      | $d(\text{Ir})+\pi(\text{ppy}+\text{bpy})$ |
| <b>Rh3</b> 153(H) | -5.70          | 3.2             | 5.3  | 83.1 | 8.4  | $\pi^*$ (bpy)                             |
| 152(H-1)          | -9.09          | 0.6             | 0.3  | 98.1 | 1.0  | $\pi(\text{bpy})$                         |
| <b>Ir4</b> 153(H) | -5.98          | 3.4             | 3.1  | 85.8 | 7.6  | $\pi^*$ (bpy)                             |
| 152(H-1)          | -9.07          | 30.8            | 62.9 | 4.7  |      | $d(\text{Ir}) + \pi(\text{ppy})$          |

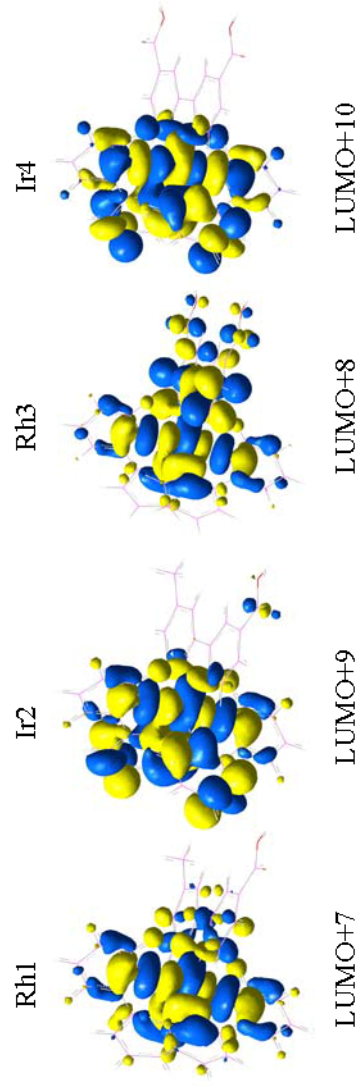

**Fig. S1** The calculated d(M, M=Rh or Ir)-based  $e_g^*$ -like orbital of the complexes.



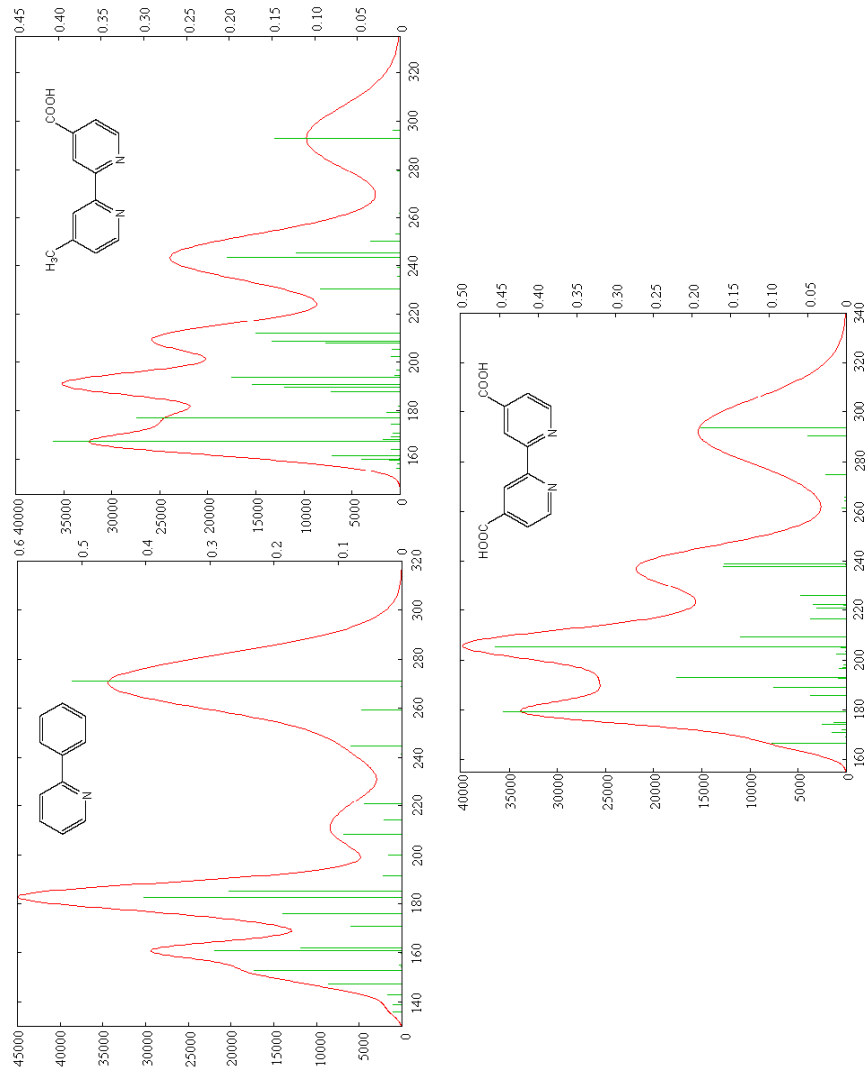

**Fig.S2** The simulated absorption spectra of isolated ligands in acetonitrile media.
